# Supplementary material for: The Serogroup B Meningococcal Vaccine Bexsero Elicits Antibodies to Neisseria gonorrhoeae
Source: PubMed Central journal article supplement — Clin Infect Dis. 2018 Dec 14;69(7):1101–11. doi: 10.1093/cid/ciy1061 (PMC6743822; doi:10.1093/cid/ciy1061), 2018-12-14
Supplement: ciy1061_suppl_supplementary_data.pdf [file ciy1061_suppl_supplementary_data.pdf]

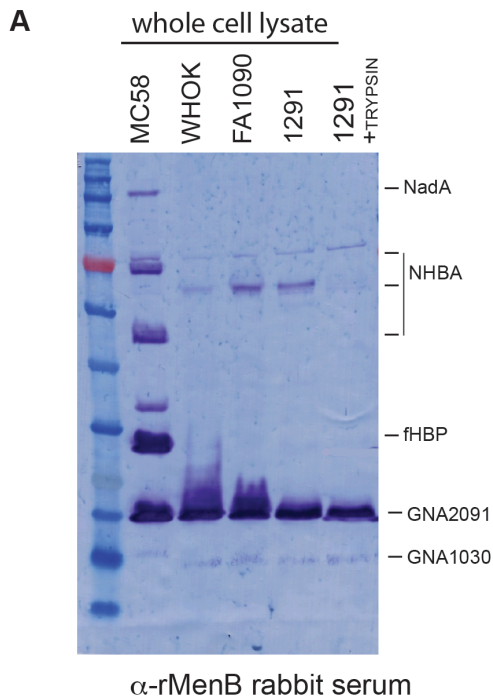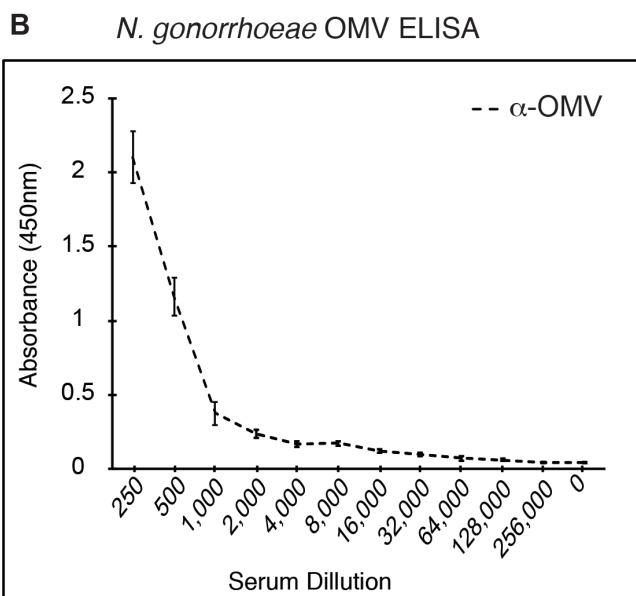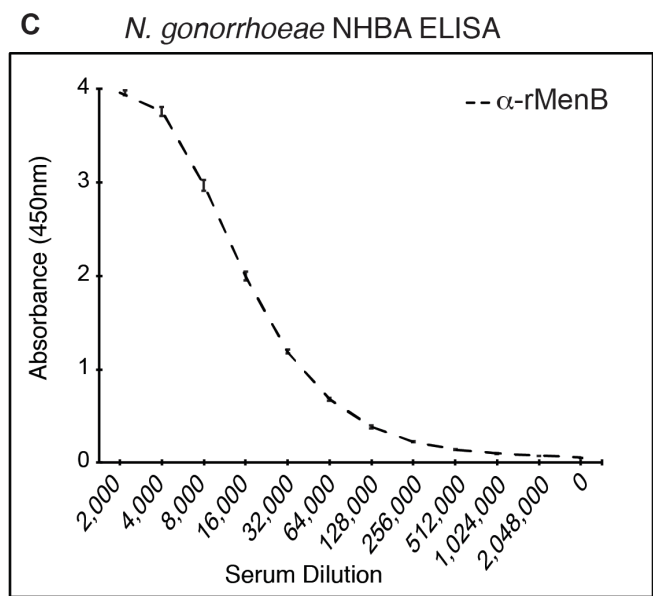

**Figure S1. Reactivity of rabbit serum raised against Bexsero antigens to *N. gonorrhoeae* antigens.** (A) Digitally overexposed Western blot with rabbit serum immunised to the recombinant protein component of Bexsero ( $\alpha$ -rMenB), from figure 2C. Samples shown are whole cell lysates from *N. meningitidis* (strain MC58) and *N. gonorrhoeae* (strains WHO K, FA1090, 1291), and *N. gonorrhoeae* strain 1291 treated with trypsin for 60 min to remove surface proteins (1291+TRYPsin). (B-C) Enzyme linked immunosorbent assay (ELISA) titration curves of rabbit serum immunised with the NZ98/254 outer membrane vesicle component of Bexsero ( $\alpha$ -OMV), and rabbit serum immunised to the recombinant protein component of Bexsero ( $\alpha$ -rMenB) against *N. gonorrhoeae* strain 1291 (B) OMV or (C) recombinant NHBA (rNHBA), respectively. The average absorbance ( $\pm$  standard deviation) at 450 nm is shown versus reciprocal serum dilutions.

*N. gonorrhoeae* OMV

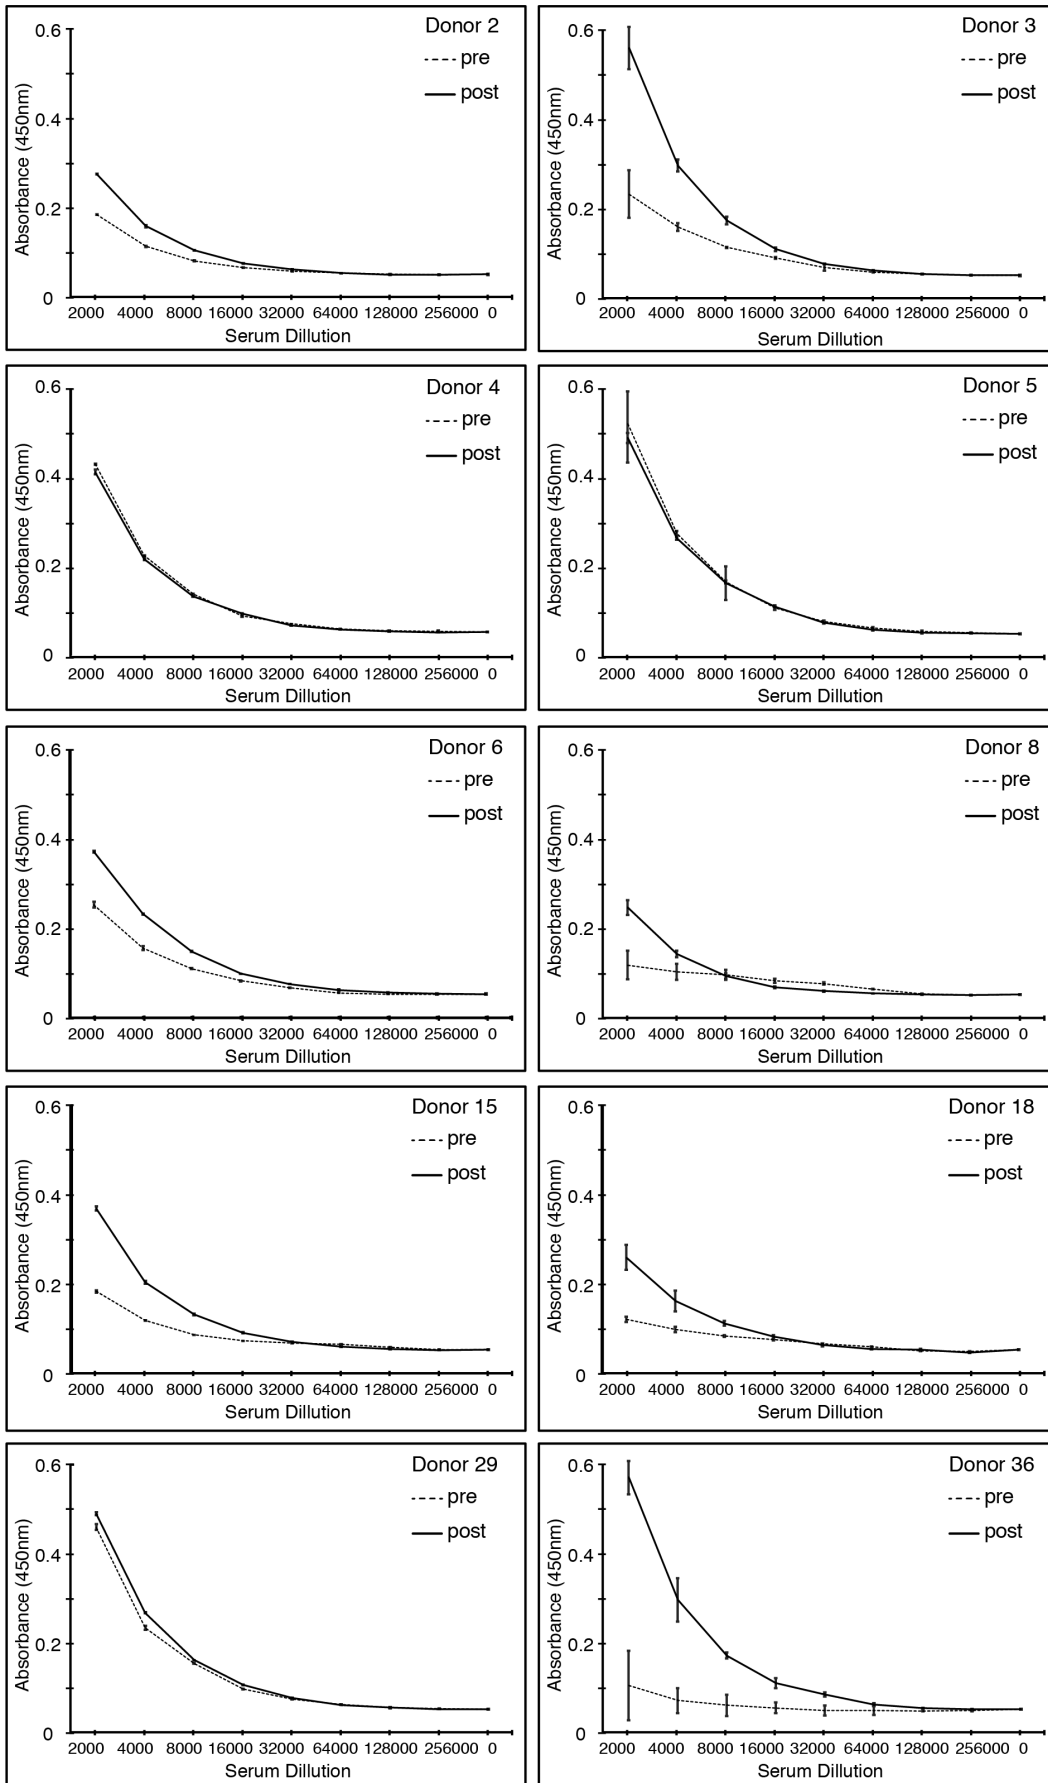

**Figure S2. Reactivity of Bexsero-vaccinated human serum to *N. gonorrhoeae* outer membrane vesicle (OMV) antigens.** Enzyme linked immunosorbent assay (ELISA) titration curves of Bexsero-vaccinated human serum from ten donors vaccinated with three doses of Bexsero at zero, three and six months. Each panel shows one donor, with reactivity of pre-vaccination serum (month 0, dashed line) and one-month post dose 3 (month 7, solid line) against *N. gonorrhoeae* strain 1291 OMVs. The average absorbance (+/- standard deviation) at 450 nm is shown versus reciprocal serum dilutions.

*N. gonorrhoeae* whole cell ELISA

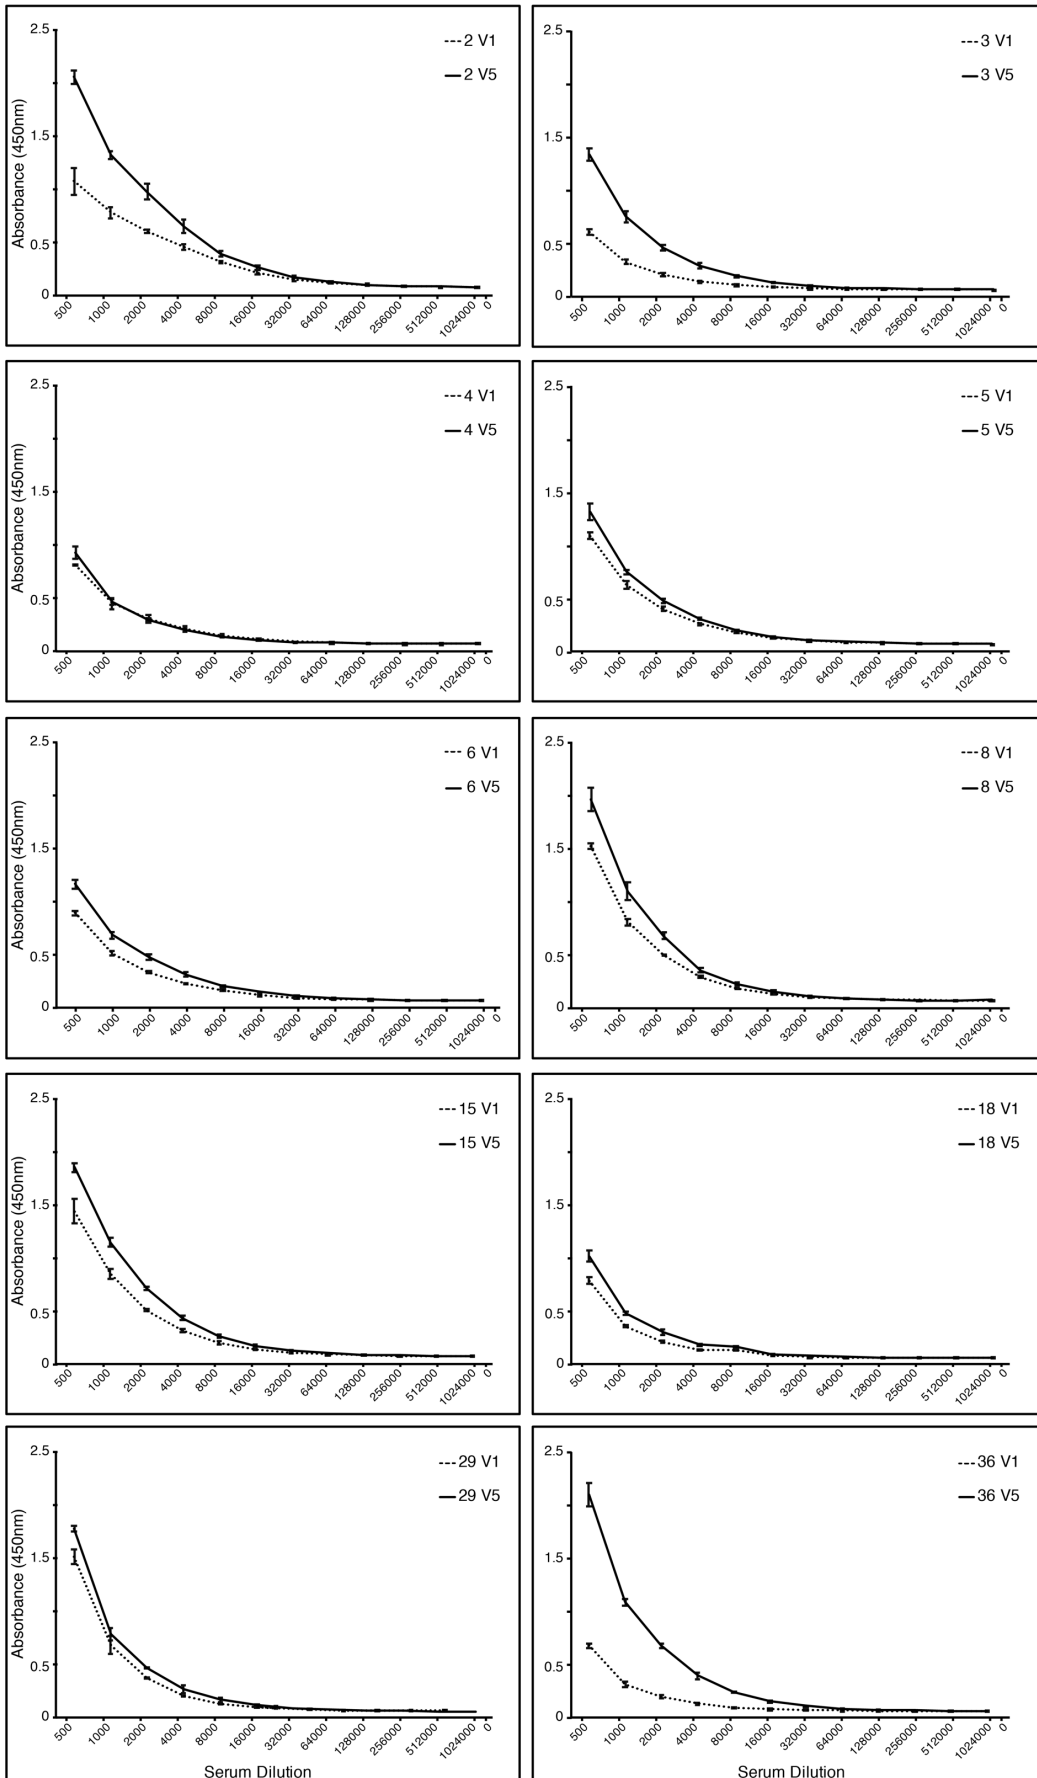

**Figure S3. Reactivity of Bexsero-vaccinated human serum to whole cell *N. gonorrhoeae*.** Enzyme linked immunosorbent assay (ELISA) titration curves of Bexsero-vaccinated human serum from ten donors vaccinated with three doses of Bexsero at zero, three and six months. Each panel shows one donor, with reactivity of pre-vaccination serum (month 0, dashed line) and one-month post dose 3 (month 7, solid line) against whole cell *N. gonorrhoeae* strain 1291. The average absorbance (+/- standard deviation) at 450 nm is shown versus reciprocal serum dilutions.

*N. meningitidis* whole cell ELISA

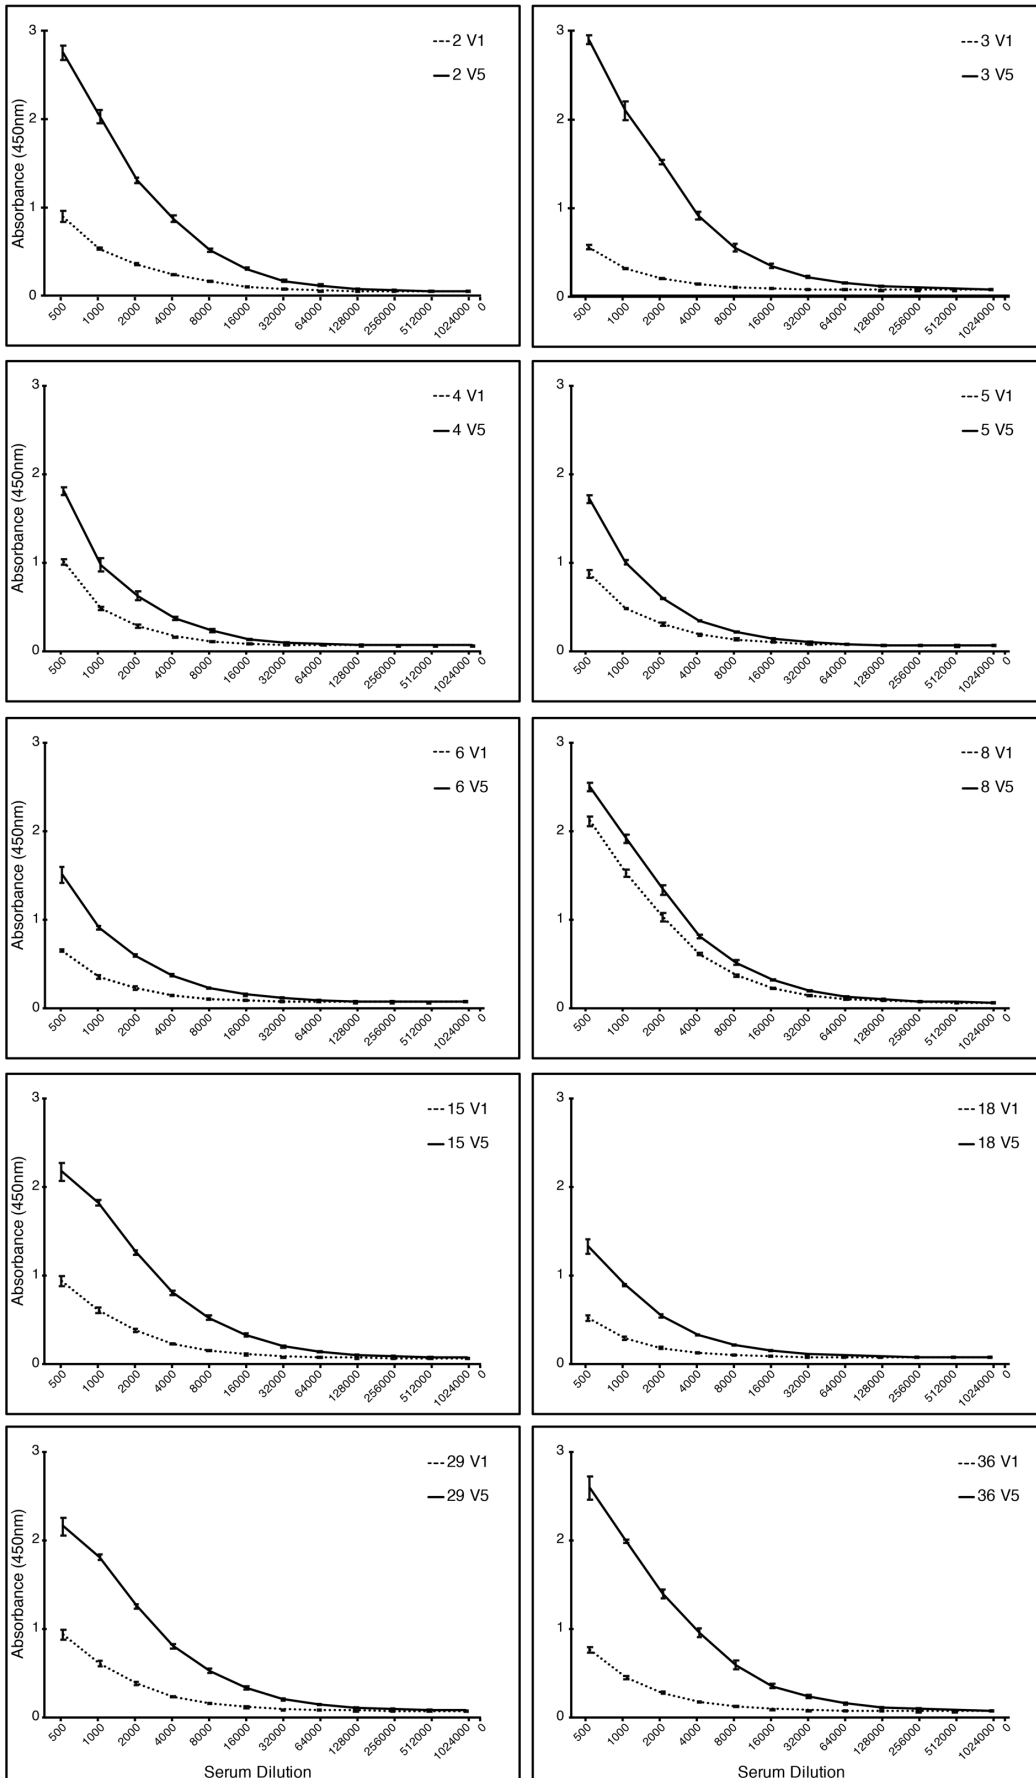

**Figure S4. Reactivity of Bexsero-vaccinated human serum to whole cell *N. meningitidis*.** Enzyme linked immunosorbent assay (ELISA) titration curves of Bexsero-vaccinated human serum from ten donors vaccinated with three doses of Bexsero at zero, three and six months. Each panel shows one donor, with reactivity of pre-vaccination serum (month 0, dashed line) and one-month post dose 3 (month 7, solid line) against whole cell *N. meningitidis* strain MC58. The average absorbance (+/- standard deviation) at 450 nm is shown versus reciprocal serum dilutions.

*N. gonorrhoeae* rNHBA

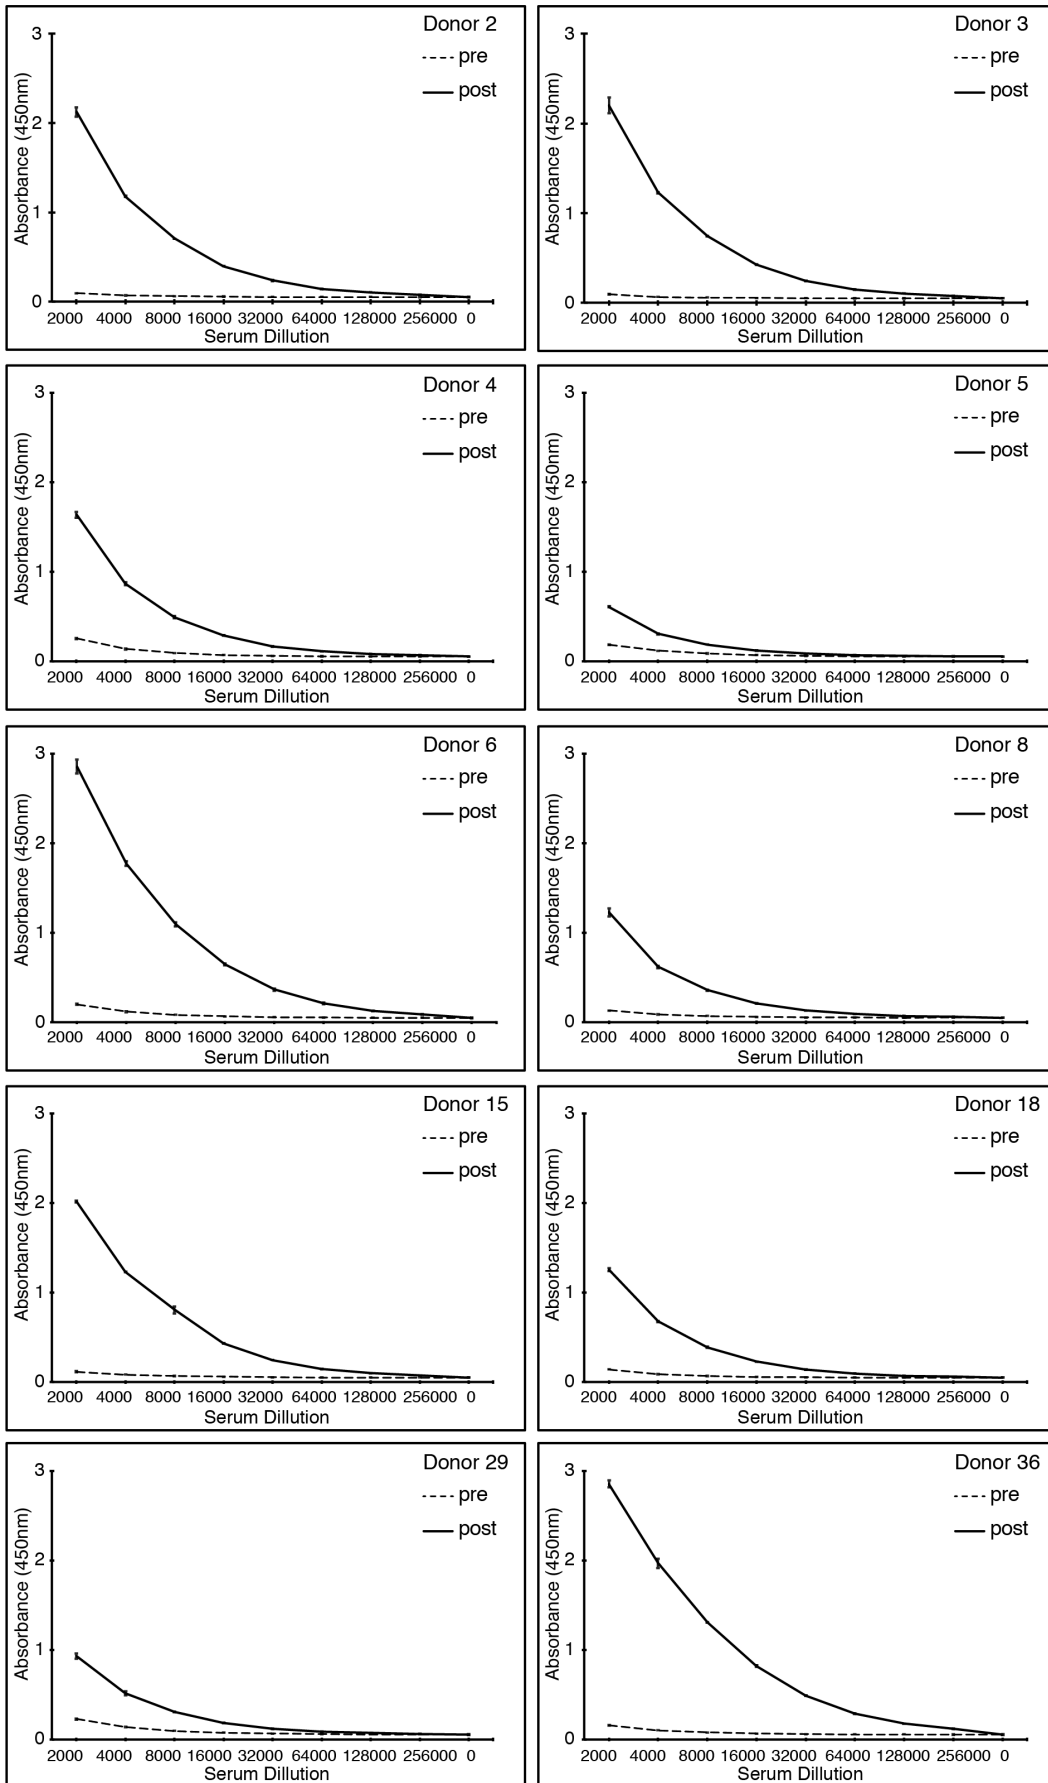

**Figure S5. Reactivity of Bexsero-vaccinated human serum to *N. gonorrhoeae* recombinant NHBA (rNHBA).** Enzyme linked immunosorbent assay (ELISA) titration curves of Bexsero-vaccinated human serum from ten donors vaccinated with three doses of Bexsero at zero, three and six months. Each panel shows one donor, with reactivity of pre-vaccination serum (month 0, dashed line) and one-month post dose 3 (month 7, solid line) against *N. gonorrhoeae* strain 1291 rNHBA. The average absorbance (+/- standard deviation) at 450 nm is shown versus reciprocal serum dilutions.

**A** *N. gonorrhoeae* LPS ELISA

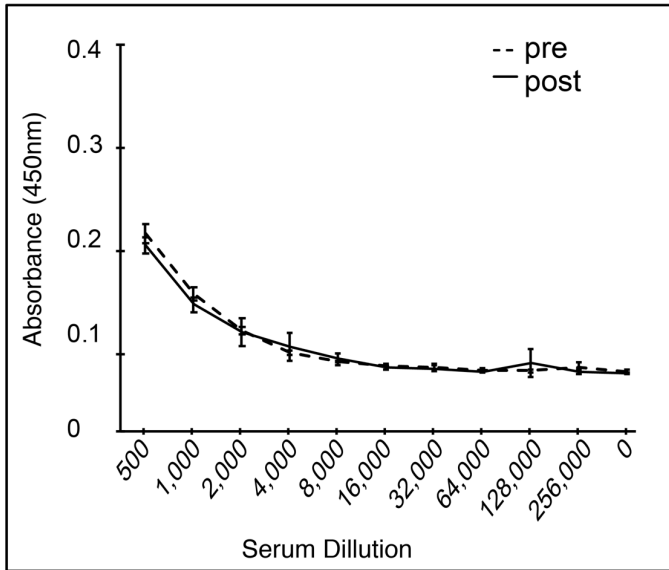

**B** *N. meningitidis* LPS ELISA

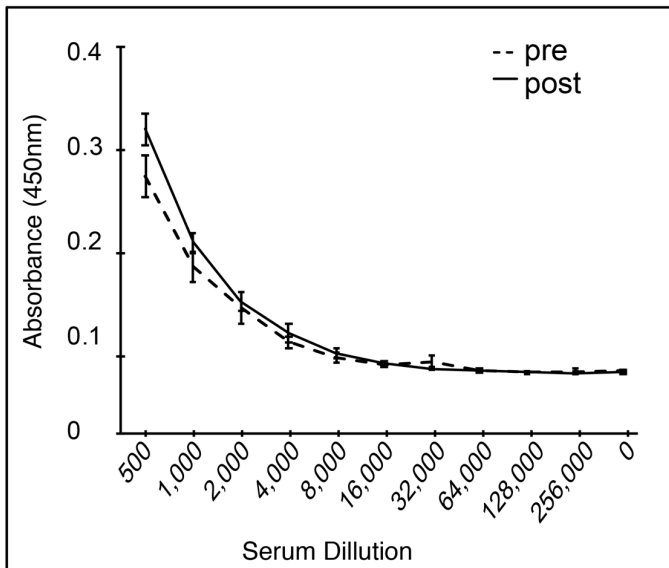

**Figure S6. Reactivity of Bexsero-vaccinated human serum to lipooligosaccharide (LPS) from *N. gonorrhoeae* and *N. meningitidis*.** Enzyme linked immunosorbent assay (ELISA) titration curves of pooled Bexsero-vaccinated human serum from ten donors vaccinated with three doses of Bexsero at zero, three and six months. Each panel shows with reactivity of pre-vaccination serum (dashed line) and one-month post final dose (solid line) against L3 LPS from (A) *N. gonorrhoeae* strain 1291 and (B) *N. meningitidis* strain MC58. The average absorbance (+/- standard deviation) at 450 nm is shown versus reciprocal serum dilutions.
